# Supplementary material
Source: HighWire-hosted journal article supplement (https://bmjopen.bmj.com/content/12/7/e058683)
Supplement: inline-supplementary-material-2 [file inline-supplementary-material-2.pdf]

## Trial Registration data

| <b>Data category</b>                          | <b>Information</b>                                                                                                                                                                                                                                                                                                                                                                                                                                                                                                                                                                                                                                                                                                                                                                                                                                                                                                                    |
|-----------------------------------------------|---------------------------------------------------------------------------------------------------------------------------------------------------------------------------------------------------------------------------------------------------------------------------------------------------------------------------------------------------------------------------------------------------------------------------------------------------------------------------------------------------------------------------------------------------------------------------------------------------------------------------------------------------------------------------------------------------------------------------------------------------------------------------------------------------------------------------------------------------------------------------------------------------------------------------------------|
| Primary registry and trial identifying number | ISRCTN registry (ISRCTN46462385).                                                                                                                                                                                                                                                                                                                                                                                                                                                                                                                                                                                                                                                                                                                                                                                                                                                                                                     |
| Date of registration in primary registry      | 13/08/2021                                                                                                                                                                                                                                                                                                                                                                                                                                                                                                                                                                                                                                                                                                                                                                                                                                                                                                                            |
| Secondary identifying numbers                 | N/A                                                                                                                                                                                                                                                                                                                                                                                                                                                                                                                                                                                                                                                                                                                                                                                                                                                                                                                                   |
| Source(s) of monetary or material support     | This research received no specific grant from any funding agency in the public, commercial or not-for-profit sectors                                                                                                                                                                                                                                                                                                                                                                                                                                                                                                                                                                                                                                                                                                                                                                                                                  |
| Primary sponsor                               | University of Birmingham                                                                                                                                                                                                                                                                                                                                                                                                                                                                                                                                                                                                                                                                                                                                                                                                                                                                                                              |
| Secondary sponsor(s)                          | N/A                                                                                                                                                                                                                                                                                                                                                                                                                                                                                                                                                                                                                                                                                                                                                                                                                                                                                                                                   |
| Contact for public queries                    | Ignacio Contreras-Hernandez (iac921@student.bham.ac.uk)                                                                                                                                                                                                                                                                                                                                                                                                                                                                                                                                                                                                                                                                                                                                                                                                                                                                               |
| Contact for scientific queries                | Eduardo Martinez-Valdes (E.A.MartinezValdes@bham.ac.uk)                                                                                                                                                                                                                                                                                                                                                                                                                                                                                                                                                                                                                                                                                                                                                                                                                                                                               |
| Public title                                  | Effects of two different exercise protocols in individuals with non-insertional Achilles tendinopathy                                                                                                                                                                                                                                                                                                                                                                                                                                                                                                                                                                                                                                                                                                                                                                                                                                 |
| Scientific title                              | Neuromuscular and structural tendon adaptations after 6-weeks of either concentric or eccentric exercise in individuals with non-insertional Achilles tendinopathy: Protocol for a randomised controlled trial.                                                                                                                                                                                                                                                                                                                                                                                                                                                                                                                                                                                                                                                                                                                       |
| Countries of recruitment                      | United Kingdom                                                                                                                                                                                                                                                                                                                                                                                                                                                                                                                                                                                                                                                                                                                                                                                                                                                                                                                        |
| Health condition(s) or problem(s) studied     | Non-insertional Achilles tendinopathy                                                                                                                                                                                                                                                                                                                                                                                                                                                                                                                                                                                                                                                                                                                                                                                                                                                                                                 |
| Intervention(s)                               | Eccentric plantarflexion contractions<br>Concentric plantarflexion contractions                                                                                                                                                                                                                                                                                                                                                                                                                                                                                                                                                                                                                                                                                                                                                                                                                                                       |
| Key inclusion and exclusion criteria          | Men or women aged 18 to 55 years old. Inclusion criteria are non-insertional Achilles tendinopathy determined by an experienced physiotherapist based on defined clinical findings, physical examination, and ultrasound assessment, as well as having pain for at least 3 months.<br><br>The exclusion criteria for healthy participants and individuals with non-insertional Achilles tendinopathy include: (1) systemic or inflammatory conditions including rheumatic, neuromuscular disorders, and malignancy, (2) current or history of chronic respiratory, neurological, or cardiovascular diseases, (3) history of lower limb surgery. Specific exclusion criteria for the participants with non-insertional Achilles tendinopathy are participation in any other treatment or rehabilitation program for Achilles tendinopathy, corticosteroid injections in the previous 12 months, and insertional Achilles tendinopathy. |
| Study type                                    | Two-arm, parallel group, randomised controlled trial.                                                                                                                                                                                                                                                                                                                                                                                                                                                                                                                                                                                                                                                                                                                                                                                                                                                                                 |
| Date of first enrolment                       | 04/10/2021                                                                                                                                                                                                                                                                                                                                                                                                                                                                                                                                                                                                                                                                                                                                                                                                                                                                                                                            |
| Target sample size                            | A total of 26 individuals with non-insertional Achilles tendinopathy and 13 healthy controls                                                                                                                                                                                                                                                                                                                                                                                                                                                                                                                                                                                                                                                                                                                                                                                                                                          |
| Recruitment status                            | Recruiting                                                                                                                                                                                                                                                                                                                                                                                                                                                                                                                                                                                                                                                                                                                                                                                                                                                                                                                            |

|                        |                                                                                                                                                                                                                                                                              |
|------------------------|------------------------------------------------------------------------------------------------------------------------------------------------------------------------------------------------------------------------------------------------------------------------------|
| Primary outcome(s)     | The primary outcomes for this study will be gastrocnemius medialis, gastrocnemius lateralis, and soleus muscles motor unit firing properties. These properties include motor unit discharge rate, recruitment and de-recruitment thresholds, and discharge rate variability. |
| Key secondary outcomes | Secondary outcomes will include level of pain and function, Achilles tendon length, thickness, cross-sectional area, and stiffness.                                                                                                                                          |

**\* This template is copyrighted by the SPIRIT Group and is reproduced by BMJ with their permission.**

From: Chan A, Tetzlaff JM, Gøtzsche PC, Altman DG, Mann H, Berlin JA, Dickersin K, Hróbjartsson A, Schulz KF, Parulekar WR, Krleža-Jeric K, Laupacis A, Moher D. SPIRIT 2013 explanation and elaboration: guidance for protocols of clinical trials. *BMJ* 2013; 346:e7586
