# Supplementary material
Source: HighWire-hosted journal article supplement (https://bmjopen.bmj.com/content/12/7/e058683)
Supplement: inline-supplementary-material-3 [file inline-supplementary-material-3.pdf]

| Timepoint                               | STUDY PERIOD |            |                                  |    |    |    |    |    |    |    |    |     |     |     |     |     |     |                                |                                |
|-----------------------------------------|--------------|------------|----------------------------------|----|----|----|----|----|----|----|----|-----|-----|-----|-----|-----|-----|--------------------------------|--------------------------------|
|                                         | Enrolment    | Allocation | Post-allocation (6-weeks period) |    |    |    |    |    |    |    |    |     |     |     |     |     |     | Close-out                      |                                |
|                                         | -t1          | 0          | t1                               | t2 | t3 | t4 | t5 | t6 | t7 | t8 | t9 | t10 | t11 | t12 | t13 | t14 | t15 | t16<br>(follow-up at 3 months) | t17<br>(follow-up at 6 months) |
| ENROLMENT:                              |              |            |                                  |    |    |    |    |    |    |    |    |     |     |     |     |     |     |                                |                                |
| Eligibility screen                      | x            |            |                                  |    |    |    |    |    |    |    |    |     |     |     |     |     |     |                                |                                |
| Informed consent                        | x            |            |                                  |    |    |    |    |    |    |    |    |     |     |     |     |     |     |                                |                                |
| Allocation                              |              | x          |                                  |    |    |    |    |    |    |    |    |     |     |     |     |     |     |                                |                                |
| INTERVENTIONS:                          |              |            |                                  |    |    |    |    |    |    |    |    |     |     |     |     |     |     |                                |                                |
| Eccentric training                      |              |            |                                  | x  | x  | x  | x  | x  | x  |    | x  | x   | x   | x   | x   | x   |     |                                |                                |
| Concentric training                     |              |            |                                  | x  | x  | x  | x  | x  | x  |    | x  | x   | x   | x   | x   | x   |     |                                |                                |
| ASSESSMENTS:                            |              |            |                                  |    |    |    |    |    |    |    |    |     |     |     |     |     |     |                                |                                |
| Anthropometric data                     |              |            | x                                |    |    |    |    |    |    |    |    |     |     |     |     |     |     |                                |                                |
| NRS                                     |              |            | x                                |    |    |    |    |    |    | x  |    |     |     |     |     |     | x   | x                              | x                              |
| VISA-A                                  |              |            | x                                |    |    |    |    |    |    | x  |    |     |     |     |     |     | x   | x                              | x                              |
| IPAQ-SF                                 |              |            | x                                |    |    |    |    |    |    | x  |    |     |     |     |     |     | x   |                                |                                |
| FAAM                                    |              |            | x                                |    |    |    |    |    |    | x  |    |     |     |     |     |     | x   |                                |                                |
| PCS                                     |              |            | x                                |    |    |    |    |    |    | x  |    |     |     |     |     |     | x   |                                |                                |
| TSK                                     |              |            | x                                |    |    |    |    |    |    | x  |    |     |     |     |     |     | x   |                                |                                |
| Motor unit firing properties            |              |            | x                                |    |    |    |    |    |    | x  |    |     |     |     |     |     | x   |                                |                                |
| Morphological and mechanical properties |              |            | x                                |    |    |    |    |    |    | x  |    |     |     |     |     |     | x   |                                |                                |

\* Schedule of enrolment, interventions, and assessments considering two training sessions per week. This template is copyrighted by the SPIRIT Group and is reproduced by BMJ with their permission.

From: Chan A, Tetzlaff JM, Gøtzsche PC, Altman DG, Mann H, Berlin JA, Dickersin K, Hróbjartsson A, Schulz KF, Parulekar WR, Krleža-Jeric K, Laupacis A, Moher D. SPIRIT 2013 explanation and elaboration: guidance for protocols of clinical trials. *BMJ* 2013; 346:e7586
